# Supplementary material for: Loss of Brain Angiogenesis Inhibitor-3 (BAI3) G-Protein Coupled Receptor in Mice Regulates Adaptive Thermogenesis by Enhancing Energy Expenditure
Source: MDPI journal article supplement (doi:10.3390/metabo13060711), 2023-05-31
Supplement: s1 [file s1]

## **Loss of Brain Angiogenesis Inhibitor-3 (BAI3) G-Protein Coupled Receptor in Mice Regulates Adaptive Thermogenesis by Enhancing Energy Expenditure**

**Haifa Alsharif <sup>1,2</sup>, Mary N. Latimer <sup>3</sup>, Katherine C. Perez <sup>1,2</sup>, Justin Alexander <sup>1,2</sup>, Md Mostafizur Rahman <sup>1,2</sup>,  
Anil K. Challa <sup>5</sup>, Jeong-A. Kim <sup>1,2</sup>, Sasanka Ramanadham <sup>2,4</sup>, Martin Young <sup>3</sup> and Sushant Bhatnagar <sup>1,2,\*</sup>**

<sup>1</sup> Department of Medicine, Division of Endocrinology, Diabetes, and Metabolism, Heersink School of Medicine, University of Alabama at Birmingham, Birmingham, AL 35294, USA; saba2323@uab.edu (H.A.); justinalexander@uabmc.edu (J.A.); jeongakim@uabmc.edu (J.-A.K.); kperez24@uab.edu (K.C.P.); mostafizurrahman@uabmc.edu (M.M.R.)

<sup>2</sup> Comprehensive Diabetes Center, University of Alabama at Birmingham, Birmingham, AL 35294, USA

<sup>3</sup> Division of Cardiovascular Disease, Department of Medicine, Heersink School of Medicine, University of Alabama at Birmingham, Birmingham, AL 35294, USA; martinyoung@uabmc.edu (M.Y.)

<sup>4</sup> Department of Biology, University of Alabama at Birmingham, Birmingham, AL 35294, USA; akchalla@uab.edu

<sup>5</sup> Department of Cell, Developmental, and Integrative Biology, University of Alabama at Birmingham, Birmingham, AL 35294, USA

\* Correspondence: sushantbhatnagar@uabmc.edu; Tel.: +205-996-0164; Fax: +205-996-5220

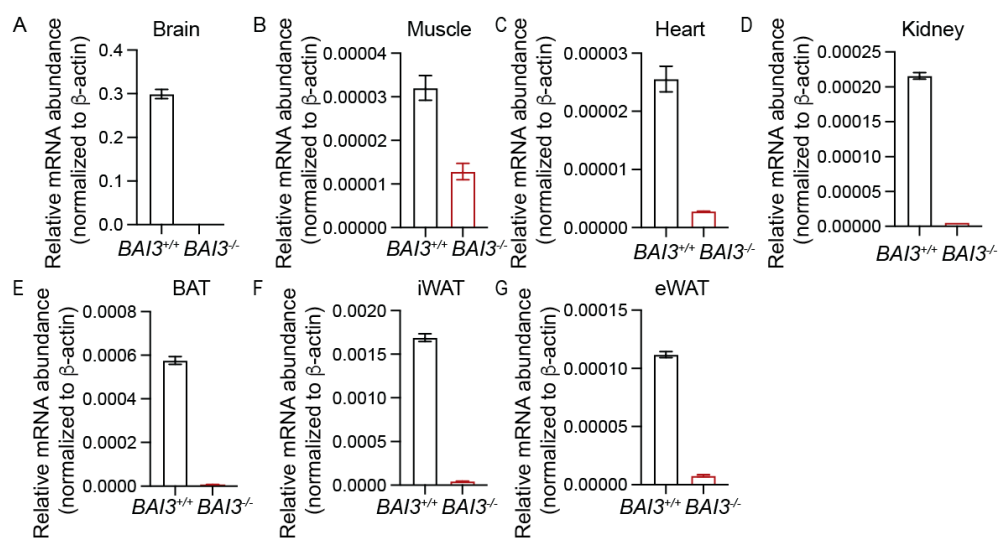

**Figure S1.** Determine the BAI3 mRNA abundance in tissues obtained from *BAI3*<sup>+/+</sup> and *BAI3*<sup>-/-</sup> male mice. The total mRNA was prepared from tissues, and steady-state mRNA abundance of BAI3 expressed relative to the β-actin was determined using qPCR (A-G). Data are reported as the mean ± SEMs, n=4, \* P < 0.05.

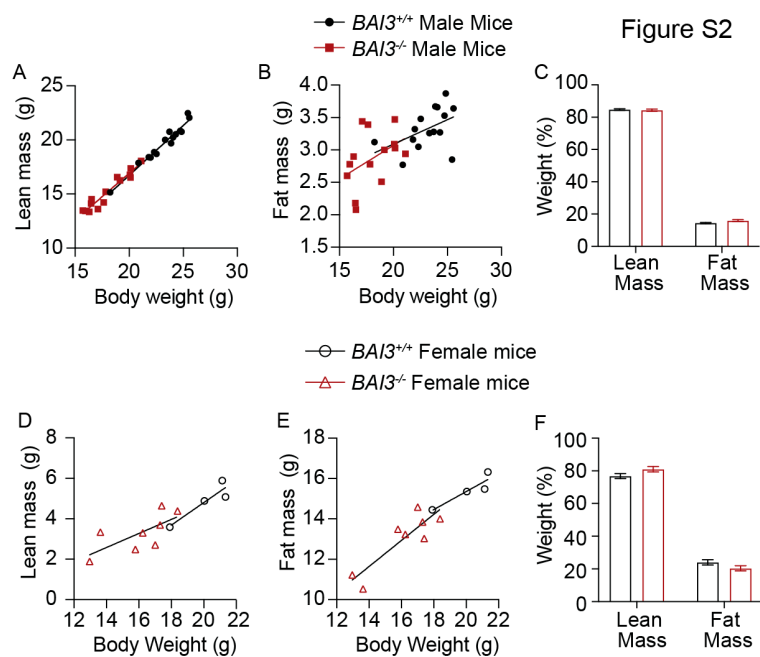

**Figure S2.** Correlation between lean or fat mass with BW in  $BAI3^{+/+}$  and  $BAI3^{-/-}$  male and female mice. Correlation of lean mass with BW (**A and D**). Correlation of fat mass with BW (**B and E**). Lean and fat mass as a percent of BW (**C and F**).
